# Supplementary material for: The conversion of levulinic acid into γ-valerolactone using Cu–ZrO2 catalysts
Source: Royal Society of Chemistry journal article supplement (doi:10.1039/c6cy00382f), 2016-01-01
Supplement: c6cy00382f1.pdf [file c6cy00382f1.pdf]

## The conversion of levulinic acid into $\gamma$ -valerolactone using Cu-ZrO<sub>2</sub> catalysts

Daniel R. Jones,<sup>a</sup> Sarwat Iqbal,<sup>a</sup> Satoshi Ishikawa,<sup>a,b</sup> Christian Reece,<sup>a</sup> Liam Thomas, Peter J. Miedziak,<sup>a</sup> David J. Morgan,<sup>a</sup> Jennifer K. Edwards,<sup>a</sup> Jonathon K. Bartley,<sup>a</sup> David J. Willock,<sup>a</sup> Graham J. Hutchings<sup>a,\*</sup>

[\\*hutch@cardiff.ac.uk](mailto:hutch@cardiff.ac.uk)

<sup>a</sup> Cardiff Catalysis Institute, Main Building, Park Place, Cardiff, CF24 3AT

<sup>b</sup> Catalysis Research Centre, Hokkaido University, N-21, W-10, Sapporo, 001-0021, Japan

### Contents

**Table S1.** Ratios of Cu/Zr measured by ICP-AES

**Table S2.** BET surface area for the catalysts prepared with different Cu/Zr ratios

**Table S3.** Particles sizes of catalysts prepared with different Cu/Zr ratio

**Table S4.** BET surface area for the catalysts calcined at different temperatures

**Table S5.** CuO particles sizes of catalysts calcined at different temperatures

**Table S6.** Cu surface area determined by N<sub>2</sub>O titration for Cu-ZrO<sub>2</sub> catalysts calcined at different temperatures.

**Figure S1.** Typical XPS profile of CuO catalyst

**Figure S2.** XRD patterns of the catalyst the used catalysts

**Figure S3:** Tem images of Cu/ZrO<sub>2</sub> a) unaged, b) after calcination for 4h, c) 6h and d) 24h.

**Table S1.** Theoretical Cu/Zr molar ratios and the measured ratios determined by ICP-AES

| Theoretical Cu/Zr Molar | Measured Cu/Zr |
|-------------------------|----------------|
| 0.25                    | 0.27           |
| 0.50                    | 0.50           |
| 0.75                    | 0.80           |
| 1.00                    | 0.99           |
| 1.25                    | 1.25           |
| 1.50                    | 1.53           |
| 2.00                    | 2.04           |

**Table S2.** BET surface area for the catalysts prepared with different Cu/Zr ratios

| Theoretical Cu/Zr | BET surface area / m <sup>2</sup> g <sup>-1</sup> |
|-------------------|---------------------------------------------------|
| 0.25              | 23                                                |
| 0.50              | 18                                                |
| 0.75              | 32                                                |
| 1.00              | 149                                               |
| 1.25              | 90                                                |
| 1.50              | 86                                                |
| 2.00              | 81                                                |

**Table S3.** Particles sizes of catalysts prepared with different Cu/Zr ratio based on the most intense peak at 35° (hkl = (111)) using the Scherrer equation.

| Cu/Zr ratio | CuO particle size / nm                                                     |
|-------------|----------------------------------------------------------------------------|
| 0.25        | Unable to acceptably estimate particle size<br>using the Scherrer equation |
| 0.50        |                                                                            |
| 0.75        |                                                                            |
| 1.00        | 11.0                                                                       |
| 1.25        | 8.3                                                                        |
| 1.50        | 20.0                                                                       |

**Table S4.** BET surface areas and particles sizes of catalysts prepared with different calcination temperatures. Particle sizes based on the most intense peak at  $35^\circ$  ( $hkl = (111)$ ) using the Scherrer equation.

| Calcination temperature / $^\circ\text{C}$ | BET surface area / $\text{m}^2 \text{g}^{-1}$ | CuO particle size / nm |
|--------------------------------------------|-----------------------------------------------|------------------------|
| 300                                        | 171                                           | 4.0                    |
| 400                                        | 149                                           | 5.4                    |
| 500                                        | 111                                           | 8.3                    |
| 600                                        | 34                                            | 12.2                   |
| 700                                        | 10                                            | 17.9                   |
| 800                                        | 6                                             | 23.4                   |

**Table S5.** BET surface areas and particles sizes of catalysts prepared with different precipitate ageing times. Particles sizes based on the most intense peak at  $35^\circ$  ( $hkl = (111)$ ) using the Scherrer equation.

| Precipitates ageing time / h | BET surface area / $\text{m}^2 \text{g}^{-1}$ | CuO particle size / nm                                                  |
|------------------------------|-----------------------------------------------|-------------------------------------------------------------------------|
| 0                            | 92.0                                          | 10.2                                                                    |
| 1                            | 97.0                                          | 8.4                                                                     |
| 2                            | 115                                           | 5.7                                                                     |
| 4                            | 126                                           | 6.3                                                                     |
| 6                            | 149                                           | 5.4                                                                     |
| 8                            | 140                                           | 5.0                                                                     |
| 11                           | 137                                           | Unable to acceptably estimate particle size using the Scherrer equation |
| 16                           | 121                                           |                                                                         |
| 24                           | 116                                           |                                                                         |

**Table S6.** Cu surface area determined by  $\text{N}_2\text{O}$  titration for Cu-ZrO<sub>2</sub> catalysts calcined at different temperatures.

| Calcination temperature / $^\circ\text{C}$ | Cu surface area / $\text{m}^2 \text{g}^{-1}$ |
|--------------------------------------------|----------------------------------------------|
| 300                                        | 1.7                                          |
| 400                                        | 4.1                                          |
| 500                                        | 0.7                                          |
| 600                                        | 4.1                                          |
| 700                                        | 1.0                                          |

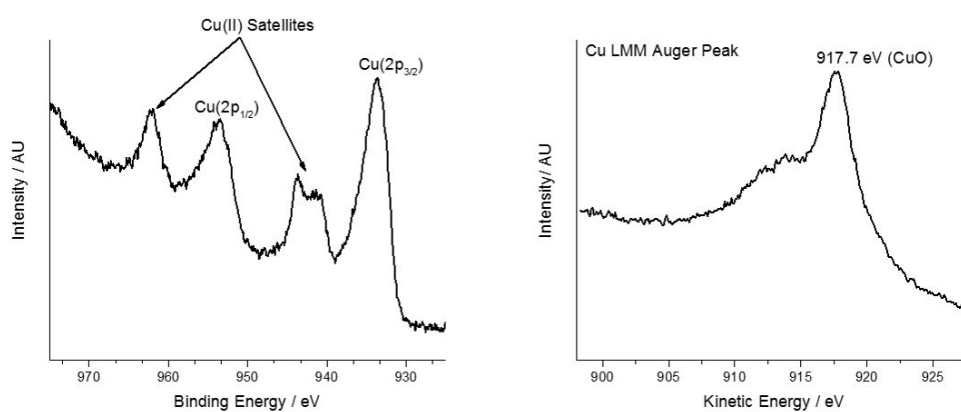

**Figure S1.** Typical XPS profile of CuO containing catalyst materials.

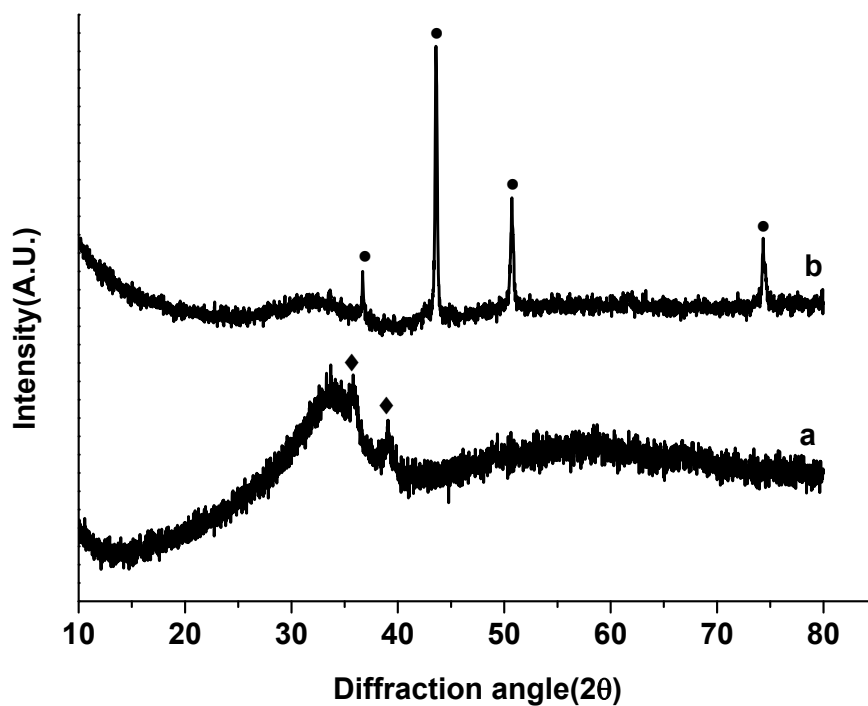

**Figure S2.** XRD patterns of the catalyst a) before and b) after reaction.  $\circ$  Cu,  $\bullet$  CuO

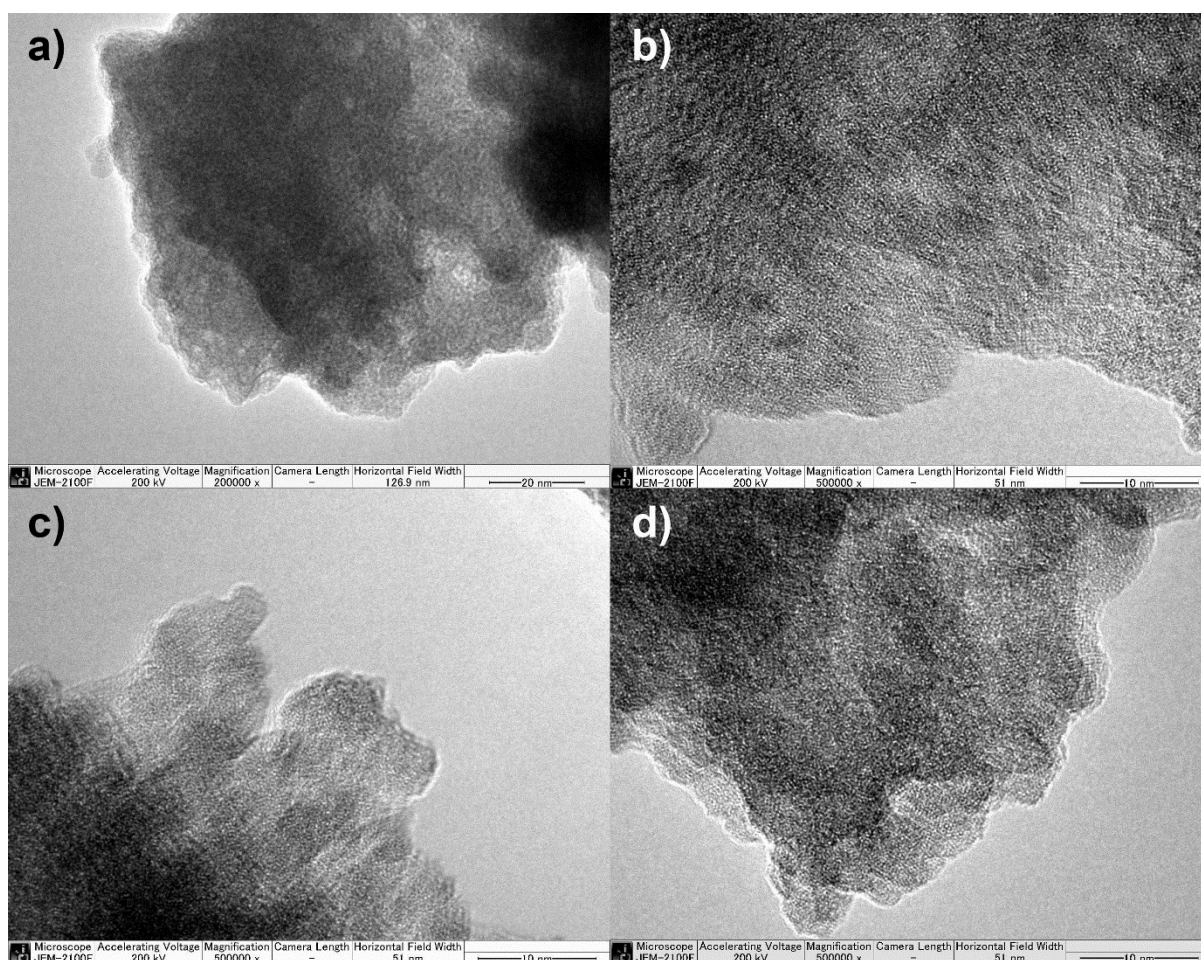

Figure S3: Tem images of Cu/ZrO<sub>2</sub> a) unaged, b) after calcination for 4h, c) 6h and d) 24h.
